# Supplementary material for: Rising Temperature May Trigger Deep Soil Carbon Loss Across Forest Ecosystems
Source: PubMed Central journal article supplement (PMC7539220; doi:10.1002/advs.202001242), 2020-08-06
Supplement: ADVS-7-2001242-s001.pdf [file ADVS-7-2001242-s001.pdf]

1 Copyright WILEY-VCH Verlag GmbH & Co. KGaA, 69469 Weinheim, Germany, 2018.

2

## 3 **Supporting Information**

4

### 5 **Rising temperature may trigger deep soil carbon loss across forest ecosystems**

6

7 *Jinquan Li, Junmin Pei, Elise Pendall, Peter B. Reich, Nam Jin Noh, Bo Li, Changming Fang, and*  
8 *Ming Nie\**

9

#### 10 **This file includes:**

11       Supplementary Text

12       Figures S1 to S7

13       Captions for Tables S1 to S3

#### 14 **Other supplementary data for this manuscript include the following:**

15       Table S1 (Excel format)

16       Table S2 (Excel format)

17       Table S3 (Excel format)

## Supplementary Text

18  
19  
20  
21  
22  
23  
24  
25  
26  
27  
28  
29  
30  
31  
32  
33  
34  
35  
36  
37  
38  
39  
40

### **A global data-synthesis of the depth dependence of the intrinsic temperature sensitivity of soil organic carbon decomposition**

In addition to our continental-scale analysis of the depth dependence of the intrinsic temperature sensitivity of soil organic carbon (SOC) decomposition ( $Q_{10}$ ) in forests, we conducted a global data-synthesis of this effect for comparison with our approach. Intrinsic  $Q_{10}$  values were obtained directly from the published literature and from calculations on the basis of published respired CO<sub>2</sub> data. Peer-reviewed works (till 2018) on  $Q_{10}$  values were collected from Google Scholar and Web of Science. To ensure data consistency and accuracy, studies that met the three criteria were selected: (i) To exclude the influence of root respiration, only results from laboratory incubation studies were included; (ii)  $Q_{10}$  values from at least two soil depths were reported in each study; (iii) for treatment experiments such as adding substrate (carbon or nutrients), only the  $Q_{10}$  values of experimentally tested ‘control’ were derived.

In total, we collected and calculated  $Q_{10}$  values from 31 published papers to synthesize the pattern of  $Q_{10}$  value with soil depth, including 267  $Q_{10}$  values from 98 soil profiles. The datasets of  $Q_{10}$  values and their corresponding information (e.g., geographic variables, climatic variables, ecosystem types, temperature range for  $Q_{10}$  value calculation, and some soil properties) were listed in Table S3 (Supporting Information).

Due to the relatively small datasets and different methods used in different individual studies (Table S3, Supporting Information), it was hard to discern a general pattern of  $Q_{10}$  value with soil depth (Figure S1, Supporting Information). For example, only 35 soil profiles were obtained for forest ecosystems, and ~66% of those soil profiles only included two soil depths. Moreover, different

41 methods were used in different studies, such as the temperature range for soil incubation and  $Q_{10}$   
42 value calculation method. Finally, soil profiles for the top 30 cm and 50 cm accounted for ~35% and  
43 ~72% of the datasets, respectively, indicating that most studies of the effect of soil depth on  $Q_{10}$  values  
44 were conducted at surficial horizons.

Supplementary Figures

45

46

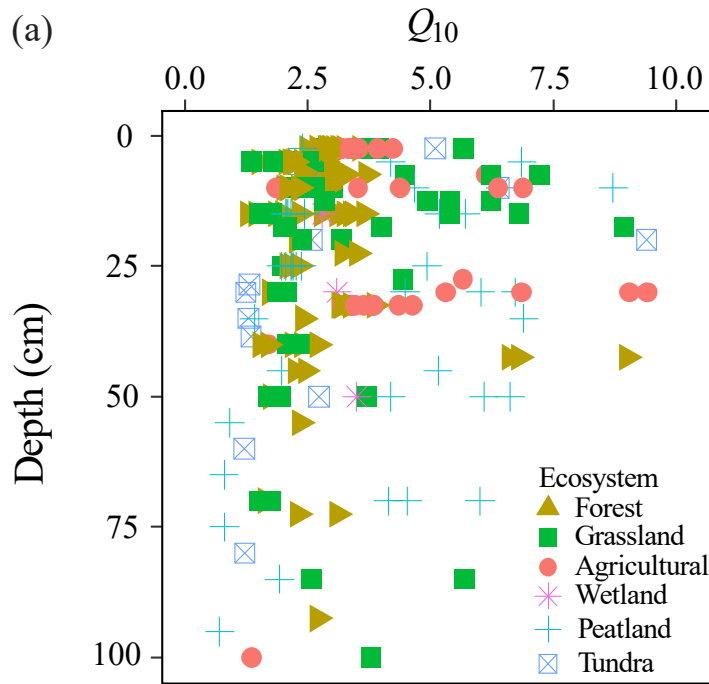

(b)

| Depth (cm) | Forest   |    | Grassland |    | Agricultural |    | Wetland  |   | Petland  |    | Tundra   |   |
|------------|----------|----|-----------|----|--------------|----|----------|---|----------|----|----------|---|
|            | $Q_{10}$ | n  | $Q_{10}$  | n  | $Q_{10}$     | n  | $Q_{10}$ | n | $Q_{10}$ | n  | $Q_{10}$ | n |
| 0–10       | 2.7(0.5) | 38 | 4.7(3.7)  | 21 | 3.6(1.4)     | 22 | 2.6(na)  | 1 | 4.2(2.4) | 10 | 4.7(2.0) | 3 |
| 10–20      | 2.5(0.8) | 14 | 4.1(2.2)  | 14 | na           | 0  | 2.8(na)  | 1 | 3.0(1.4) | 9  | 6.0(4.8) | 2 |
| 20–35      | 2.9(0.6) | 13 | 2.7(1.0)  | 6  | 4.6(2.0)     | 18 | 3.1(na)  | 1 | 3.3(1.9) | 15 | 1.3(0.0) | 3 |
| 35–50      | 3.6(2.6) | 11 | 2.3(0.7)  | 6  | 2.0(0.3)     | 4  | 3.5(na)  | 1 | 4.4(1.9) | 6  | 2.0(1.0) | 2 |
| 50–70      | 2.0(0.5) | 2  | 1.6(0.1)  | 2  | 1.7(na)      | 1  | na       | 0 | 3.3(2.3) | 5  | 1.2(na)  | 1 |
| 70–100     | 2.7(0.4) | 3  | 4.0(1.6)  | 3  | 1.4(na)      | 1  | na       | 0 | 1.2(0.7) | 3  | 1.2(na)  | 1 |

47

48 **Figure S1.** The temperature sensitivity of soil organic carbon decomposition ( $Q_{10}$ ) at different soil  
 49 depths from a global synthesis (see Supplementary Text). Raw data (a) and mean ( $\pm$ SD)  $Q_{10}$  values  
 50 (b) in different ecosystems and soil depths.  $Q_{10}$  values greater than 10.0 (~7.1% of the datasets) and  
 51 for deeper than 100 cm soil depth (~3.9% of the datasets) are excluded. n, sample size; na, not  
 52 available.

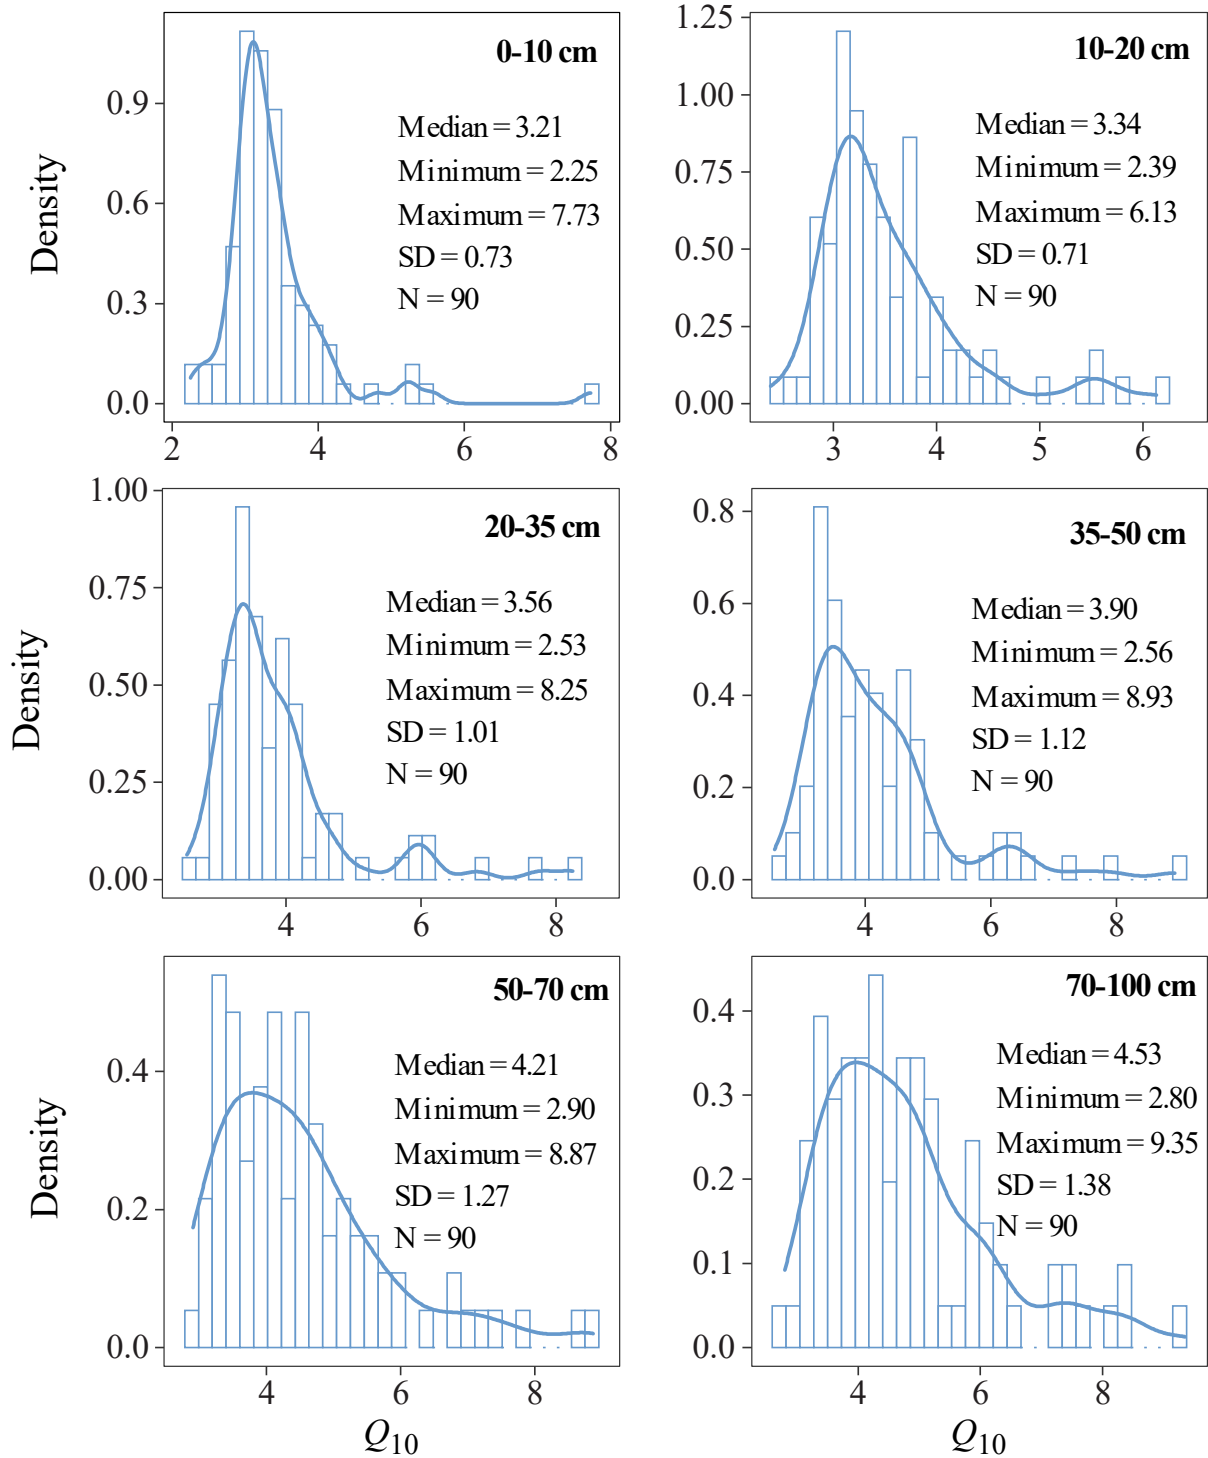

53

54 **Figure S2.** Distribution of the temperature sensitivity of soil organic carbon decomposition ( $Q_{10}$ ) at  
 55 different soil depths across China's forests.  $Q_{10}$  values are estimated based on the mean annual  
 56 temperature of each site. SD and N denote standard error and the sample size, respectively.

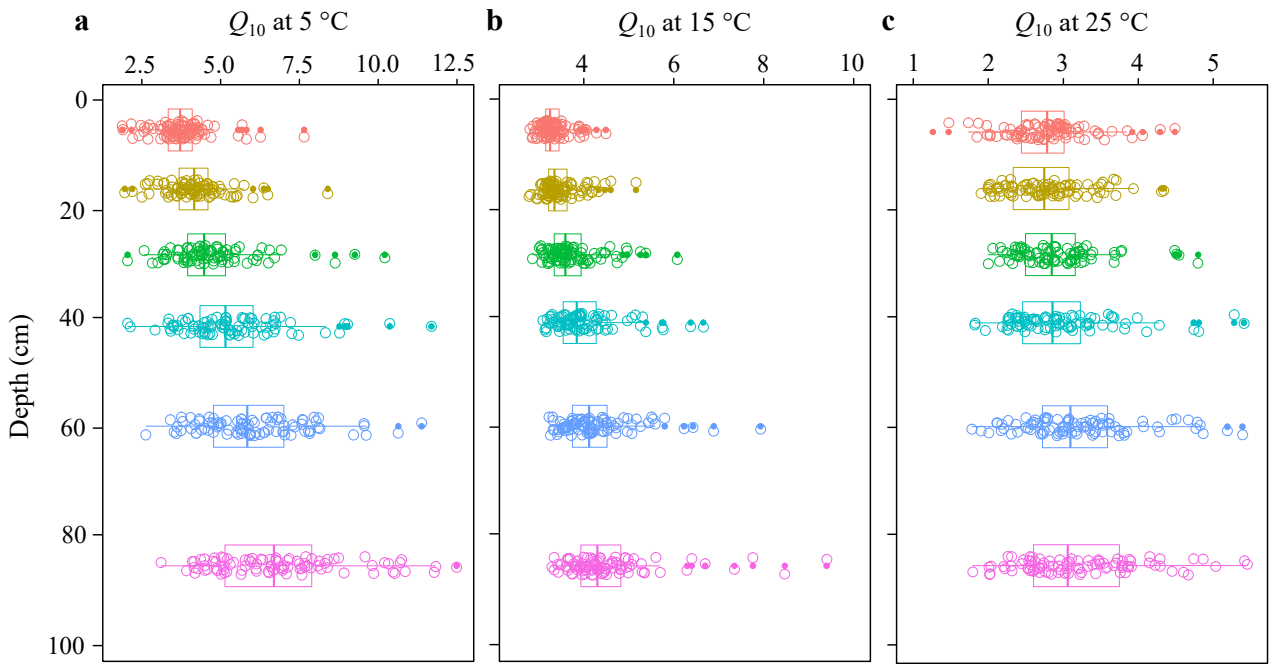

57

58 **Figure S3.** Temperature sensitivity of soil organic carbon decomposition ( $Q_{10}$ ) at some fixed  
 59 temperatures (i.e. 5, 15, and 25 °C) increases with soil depth. Box plots of  $Q_{10}$  values standardized to  
 60 fixed temperatures of 5 °C (**a**), 15 °C (**b**), and 25 °C (**c**) with soil depth. The ends of the box are the  
 61 25th and 75th quantiles, and the line across the middle of the box is the median value. Linear mixed-  
 62 effects models are used to evaluate the effect of soil depth on  $Q_{10}$  values excluding autocorrelations  
 63 of different sampling sites and depths, showing that  $Q_{10}$  values at these fixed temperatures  
 64 significantly increase with soil depth ( $P < 0.001$ ).  $Q_{10}$  at a fixed temperature is calculated on the basis  
 65 of fitted decomposition rates at a fixed temperature (e.g. 15 °C) and fixed temperature + 3 °C (e.g. 15  
 66 + 3 °C).  $N = 90$  for each soil depth.

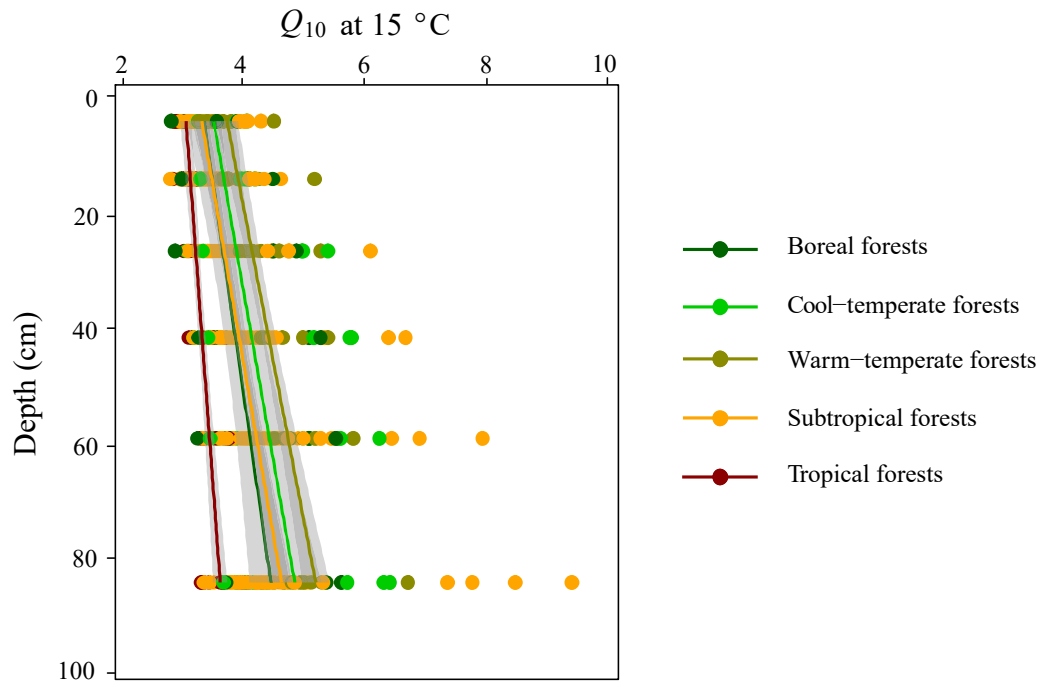

67

68 **Figure S4.** The temperature sensitivity of soil organic carbon decomposition ( $Q_{10}$ ) standardized to a  
 69 fixed temperature of 15 °C increases with soil depth among biome types. Shaded areas indicate the  
 70 bootstrapped 95% confidence intervals for each biome type. Linear mixed-effects models are used to  
 71 evaluate the effect of soil depth on  $Q_{10}$  value with excluding autocorrelations of different sampling  
 72 sites and depths, showing that  $Q_{10}$  value for each biome type significantly increase with soil depth ( $P$   
 73  $< 0.001$ ).  $Q_{10}$  at 15 °C is calculated on the basis of fitted decomposition rates at 15 °C and 15 + 3 °C.

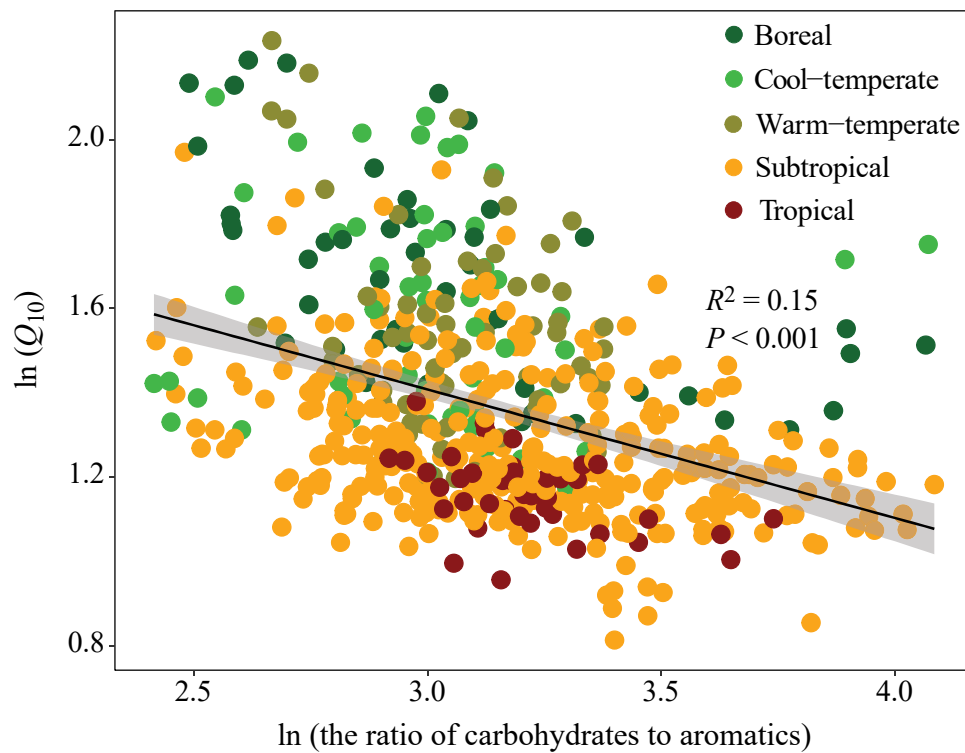

74

75 **Figure S5.** Relationships between the temperature sensitivity of soil organic carbon decomposition76 ( $Q_{10}$ ) and soil carbon quality across China's forests. Shaded areas indicate the bootstrapped 95%

77 confidence intervals. Soil carbon quality is indicated by the ratio of carbohydrates to aromatics, and

78 a higher ratio of carbohydrates to aromatics is considered as higher carbon quality.



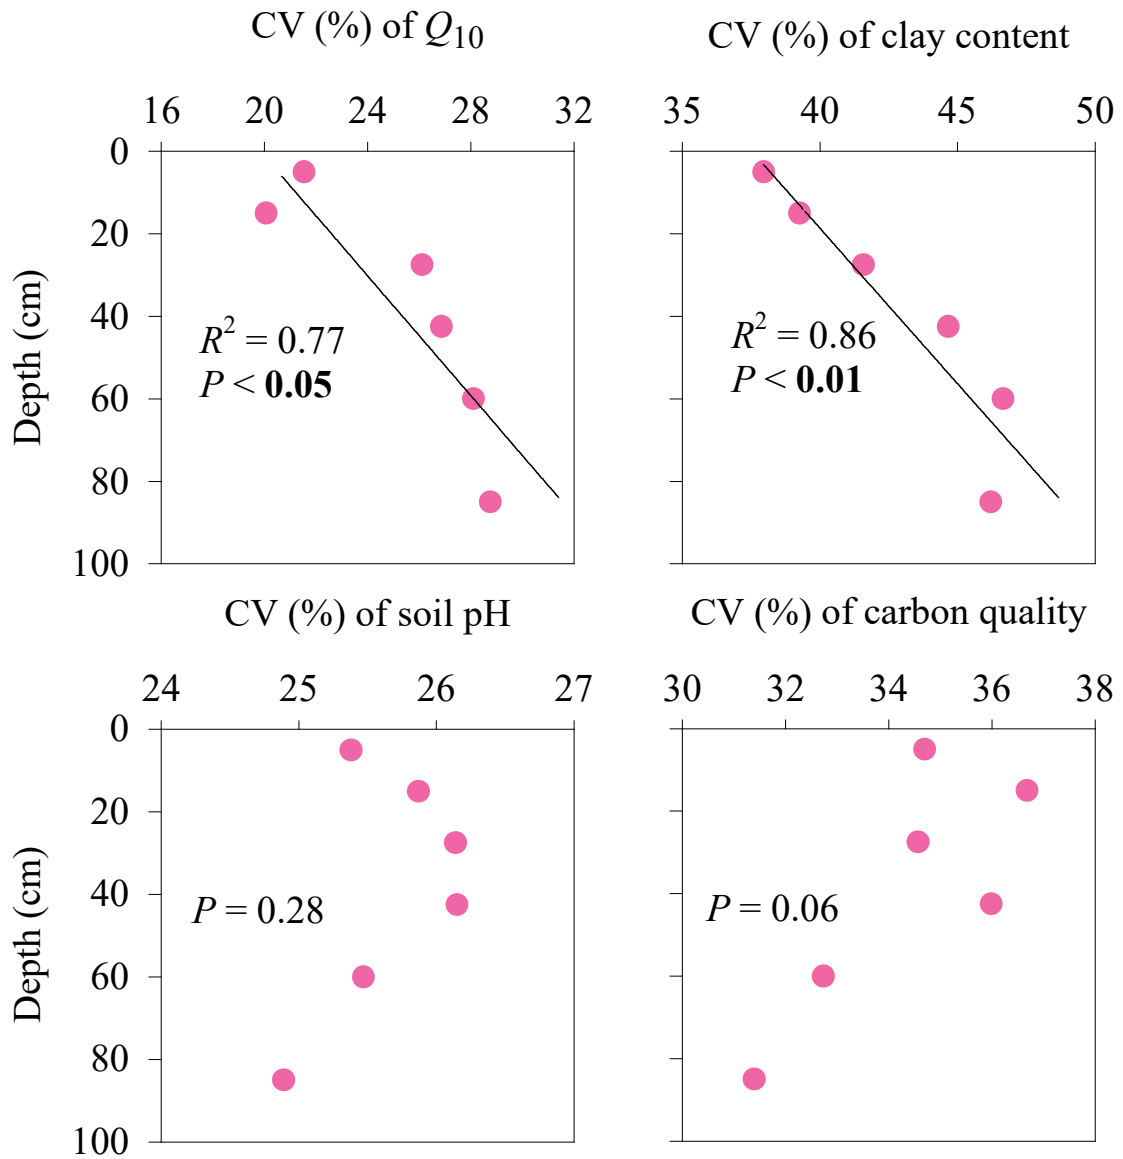

79

80 **Figure S6.** Changes in the Coefficient of Variance (%CV) of the temperature sensitivity of soil

81 organic carbon decomposition ( $Q_{10}$ ) and some soil properties with soil depth. The CV is calculated

82 as  $\frac{\text{standard deviation}}{\text{mean}} \times 100$ . Carbon quality is indicated by the ratio of carbohydrates to aromatics. N = 90

83 for each soil depth.

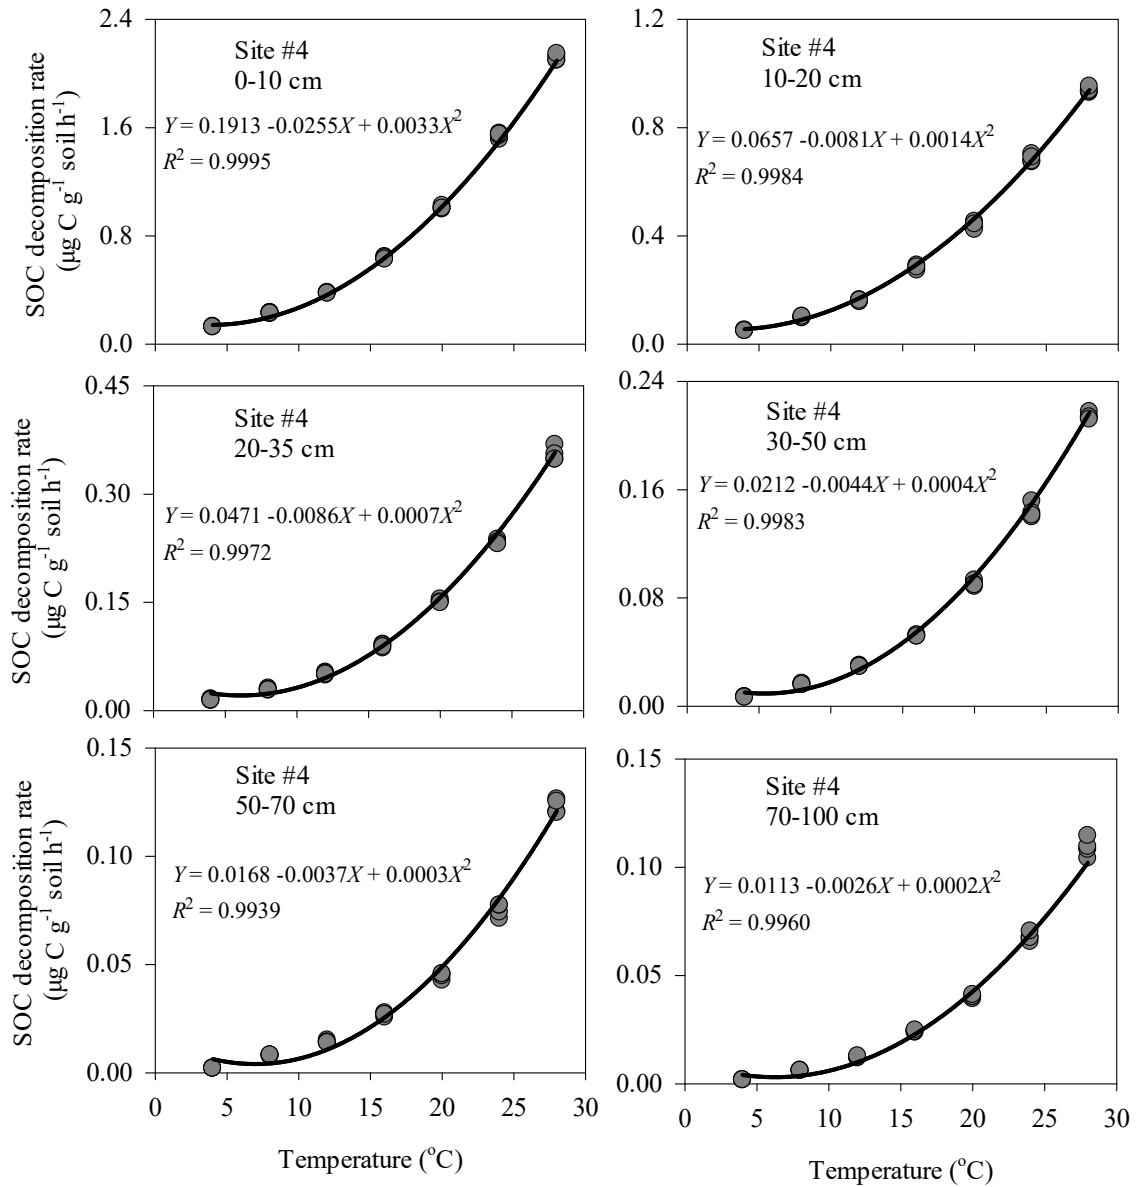

84

85 **Figure S7.** An example of the variation in soil organic carbon (SOC) decomposition rates with  
 86 incubation temperatures for different soil depths from one site. Each soil depth includes four  
 87 experimental replicates.

---

## Supplementary Tables

88

89

### 90 **Additional data table S1 (separate file)**

91 Table S1.xls contains details of the calculations of the relative SOC stock in the top 1-m depth  
92 subjected to a gradual increase of 3.0 °C over the period 2018–2100 using the single-layer and six-  
93 layer models.

### 94 **Additional data table S2 (separate file)**

95 Table S2.xls contains the geographic and climatic information, major tree species, and some soil  
96 properties (e.g. soil pH and water content) of the 90 sampling sites.

### 97 **Additional data table S3 (separate file)**

98 Table S3.xls contains the dataset of the global synthesis of the temperature sensitivity of SOC  
99 decomposition at different soil depths.
